# Supplementary material for: Competition between coordination and hydrogen bonding in networks constructed using dipyridyl-1H-pyrazole ligands
Source: Royal Society of Chemistry journal article supplement (doi:10.1039/c0ce00310g), 2010-11-30
Supplement: c0ce00310g.pdf [file c0ce00310g.pdf]

## Competition between coordination and hydrogen bonding in networks constructed using dipyridyl-1*H*-pyrazole ligands

Andrew D. Burrows, David J. Kelly, M. Infas Haja Mohideen, Mary F. Mahon, Viorica M. Pop and Christopher Richardson

### Supplementary information

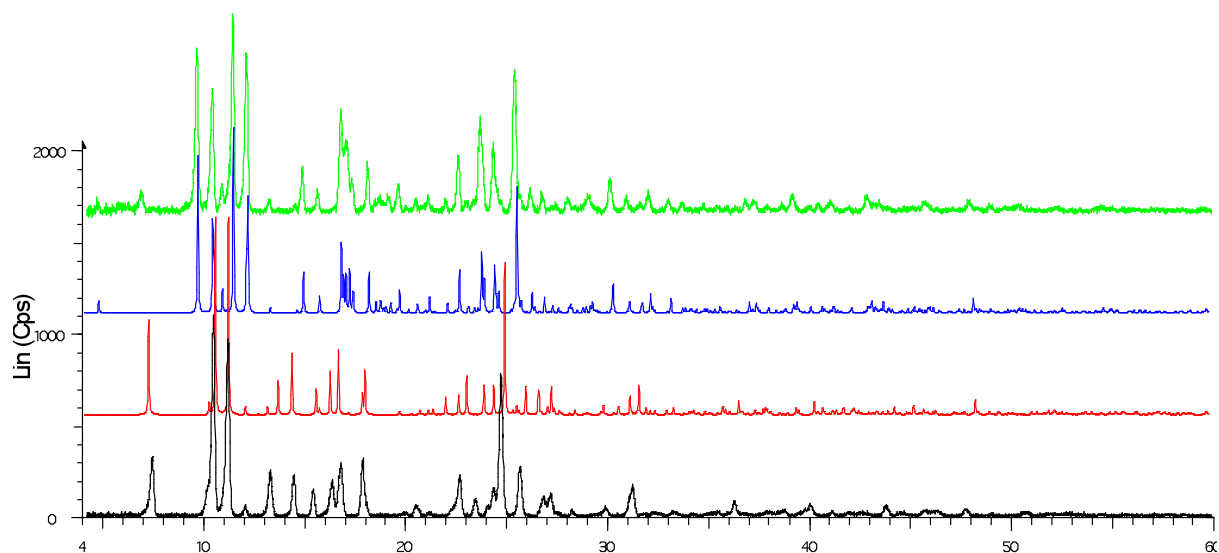

**Figure S1.** The experimental X-ray powder diffraction pattern for **1** (green), the simulated pattern for **1** (blue), the simulated pattern for **2** (red) and the experimental pattern for **2** (black).

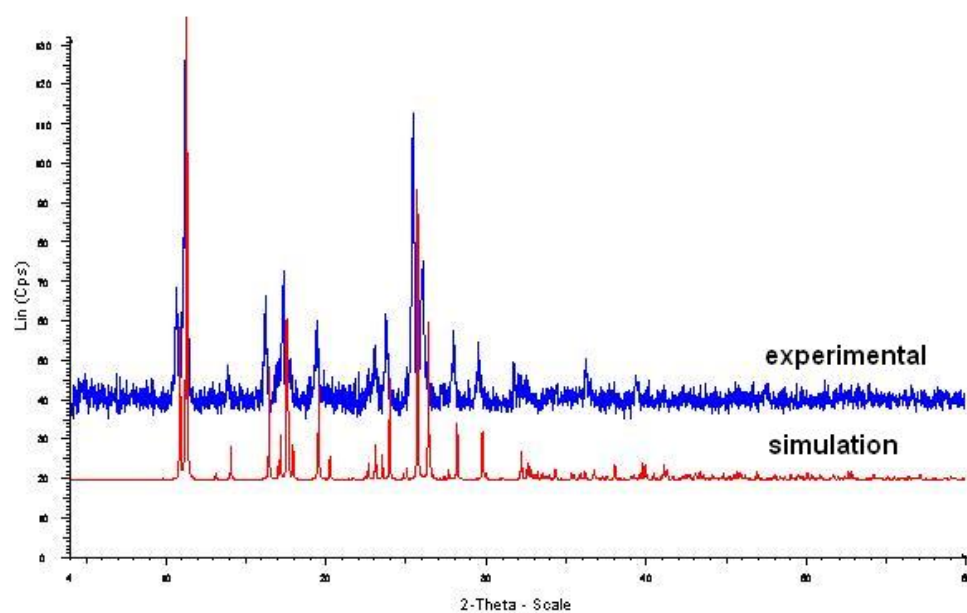

**Figure S2.** The experimental X-ray powder diffraction pattern for **3** (blue), alongside the simulated pattern (red).

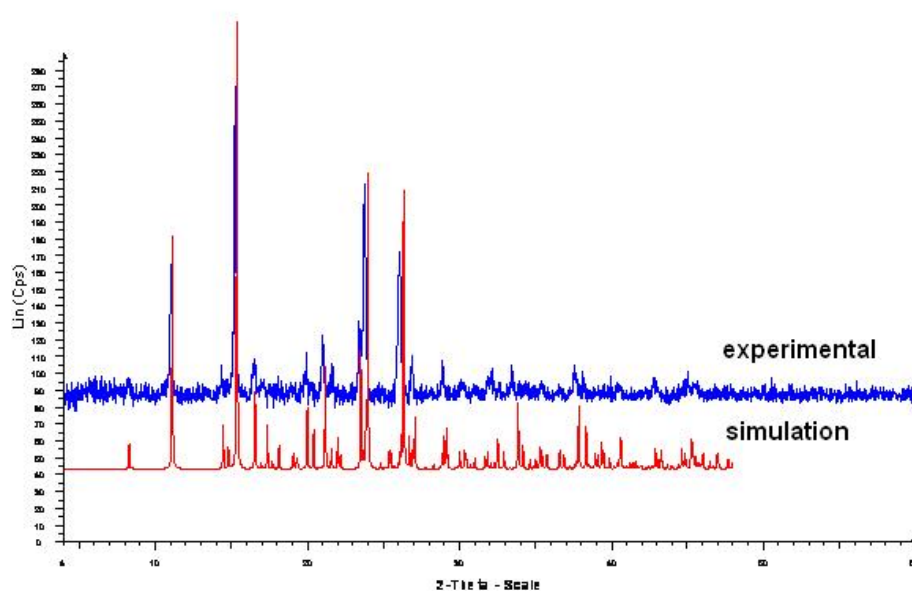

**Figure S3.** The experimental X-ray powder diffraction pattern for **4** (blue), alongside the simulated pattern (red).

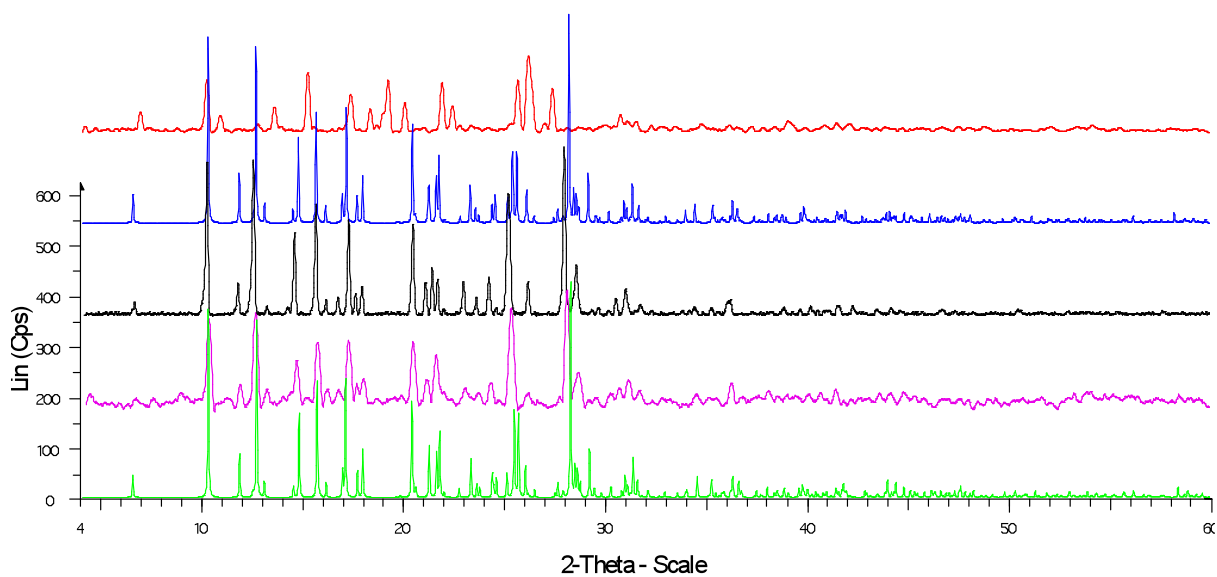

**Figure S4.** The experimental X-ray powder diffraction pattern for **5** (red), the simulated pattern for **5** (blue), the experimental pattern for **7** (black), the experimental pattern for **6** (magenta) and the simulated pattern for **6** (green).
